# Supplementary material for: Unveiling Polysomal Long Non-Coding RNA Expression on the First Day of Adipogenesis and Osteogenesis in Human Adipose-Derived Stem Cells
Source: MDPI journal article supplement (doi:10.3390/ijms25042013), 2024-02-07
Supplement: s1 [file s1]

# **SUPPLEMENTARY FILES**

For

**Unveiling polysomal long non-coding RNA expression during  
adipogenesis and osteogenesis of human adipose-derived stem cells**

Bernardo Bonilauri<sup>1,2\*</sup>, Annanda Lyra Ribeiro<sup>1</sup>, Lucia Spangenberg<sup>3</sup>, Bruno Dallagiovanna<sup>1\*</sup>

## Supplementary Figure 1

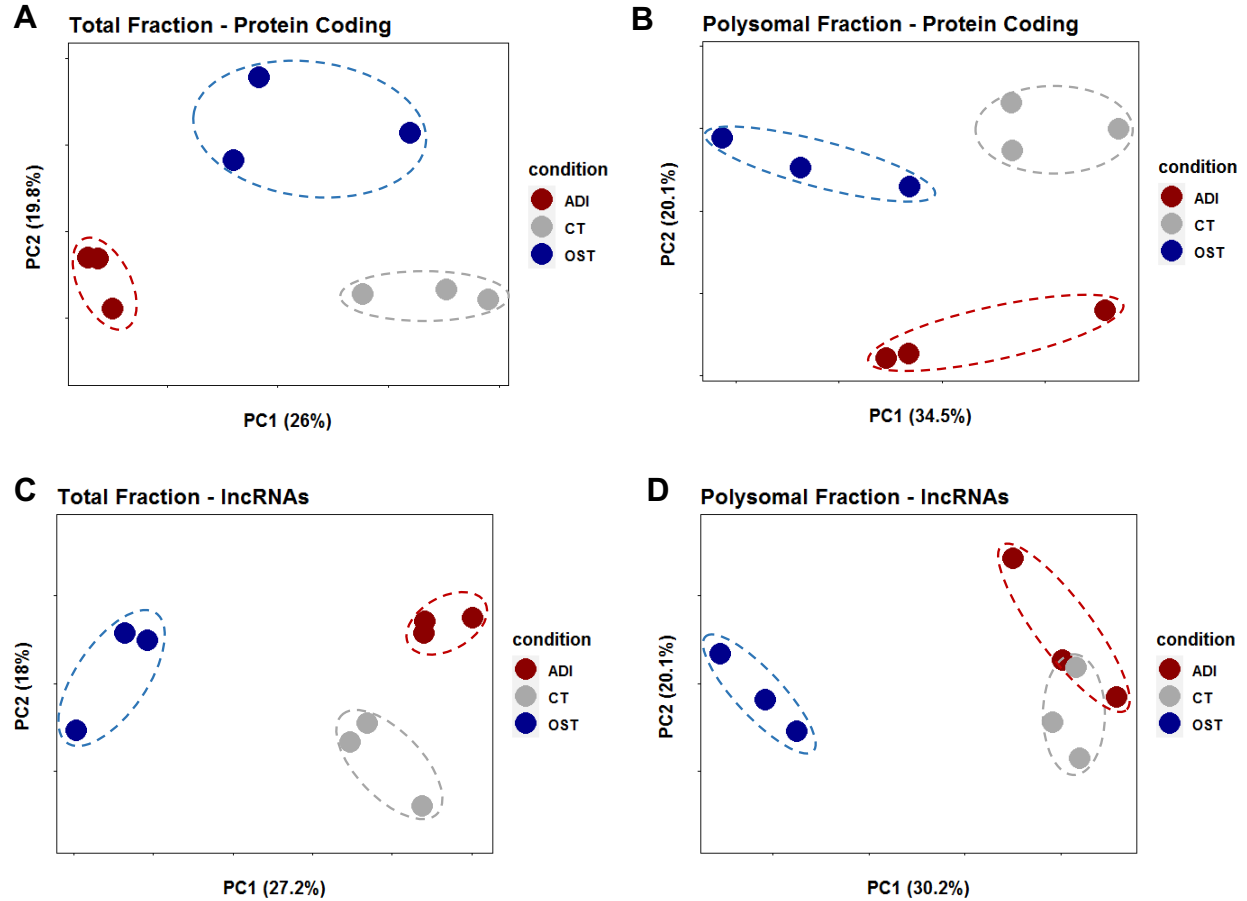

**Figure S1: Principal Component Analysis (PCA) of normalized data. (A and C)** PCA plot showing the distribution of mRNAs and lncRNAs in the total fraction, respectively. **(B and D)** PCA plot depicting the distribution of mRNAs and lncRNAs in the polysomal fraction, respectively. The conditions are represented as ADI for adipogenesis (red), OST for osteogenesis (blue), and CT for control-undifferentiated cells (gray).

## Supplementary Figure 2

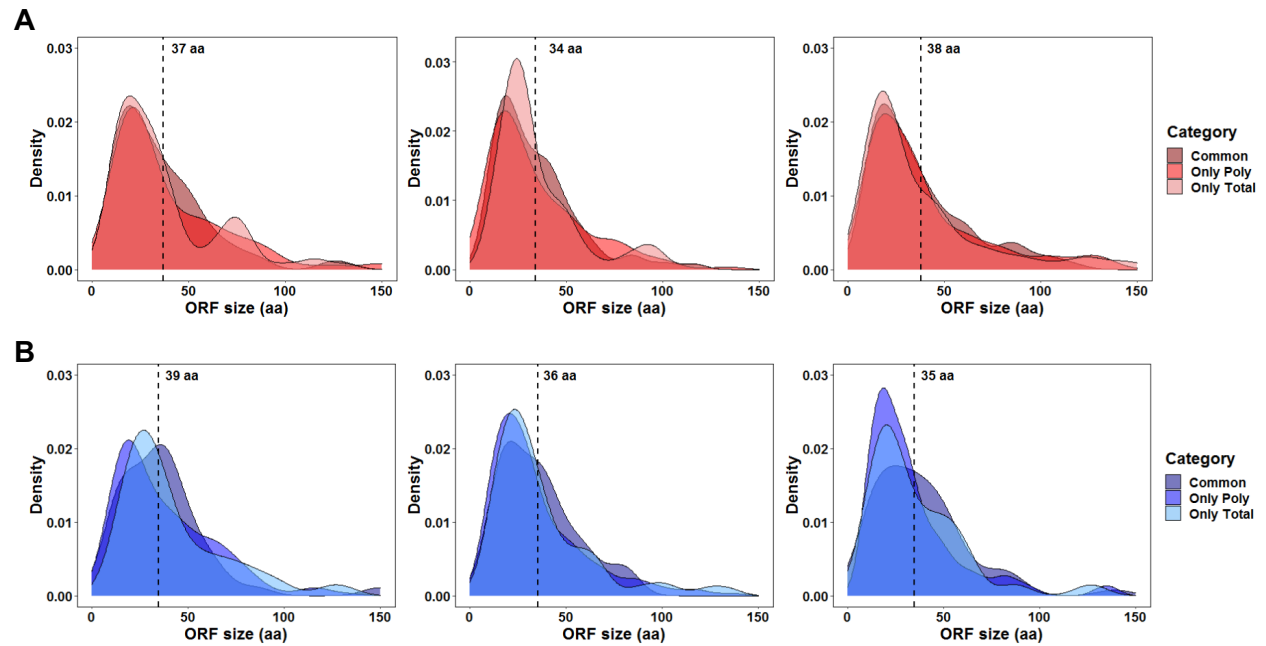

**Figure S2: Density plot illustrating the size distribution of small open reading frames (smORFs) within differentially expressed lncRNAs during 24 hours of adipogenesis and osteogenesis. (A)** The panel displays the size (aa) distribution of smORFs identified in frame 1, 2 and 3 of lncRNAs expressed during adipogenesis, respectively. **(B)** The panel shows the size (aa) distribution of smORFs identified in the frame 1, 2 and 3 of lncRNAs expressed during osteogenesis, respectively. The categories include: “Common”, representing lncRNAs expressed in both the total and polysomal fraction; “Only Total”, representing lncRNAs exclusively expressed in the total fraction; and “Only Poly”, representing lncRNAs exclusively expressed in the polysomal fraction.

Supplementary Figure 3

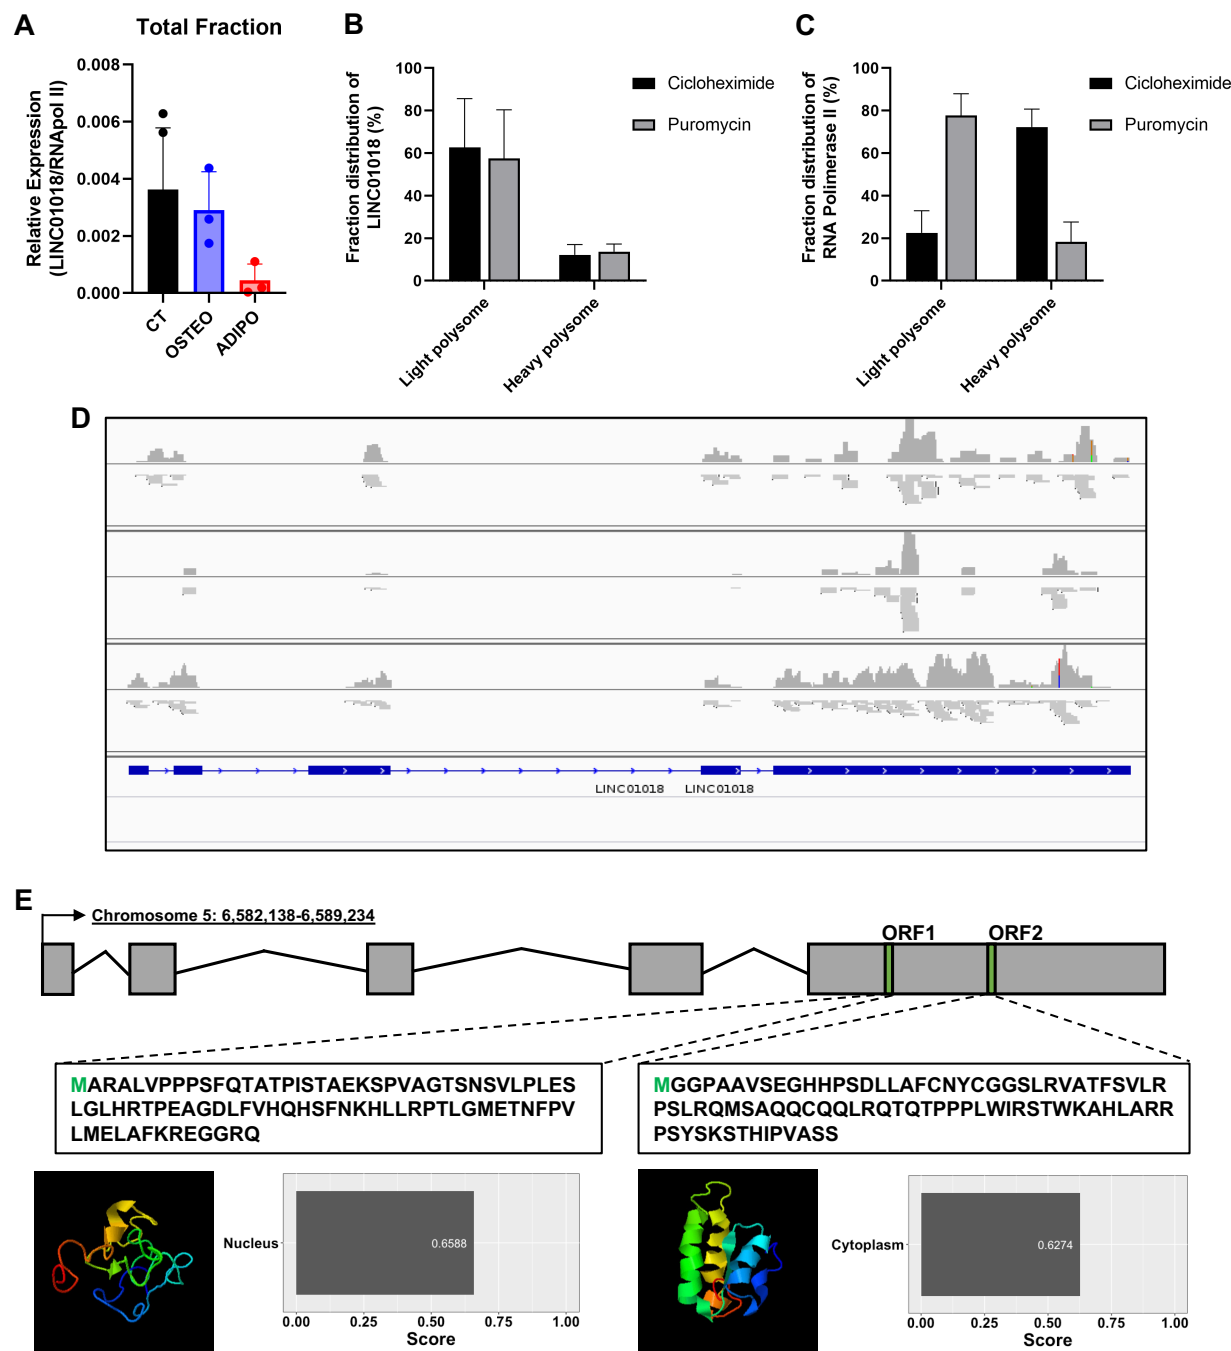

**Figure S3: Polysome-associated LINC01018.** (A) Expression levels of the polysomal-exclusive lncRNA LINC01018 as determined by RT-qPCR in the total fraction (n=3). (B) Expression levels of LINC01018 in the light polysome and heavy polysome fractions with cycloheximide or puromycin treatment. (C) Expression levels of POLR2A in the light polysome and heavy polysome fractions with cycloheximide or puromycin treatment. (D) Polysomal expression

coverage of the LINC01018 in three biological replicates after 24 hours of osteogenic differentiation. **(E)** Schematic representation of the LINC01018 transcript isoform and putative predicted ORF1 and ORF2 peptide sequence, along with structure and location predictions. Predicted 3D structures were generated using I-Tasser, and locations were predicted using DeepLoc 2.0.

**Supplementary Table 1:** Sequence of the oligonucleotides

| Gene name                                | Sequence 5'-3'                                  |
|------------------------------------------|-------------------------------------------------|
| <b>POLR2A-F</b><br><b>POLR2A -R</b>      | TACCACGTCATCTCCTTTGATGGCT<br>GTGCGGCTGCTTCCATAA |
| <b>GFP-F</b><br><b>GFP-R</b>             | TGAAGTTCGAGGGCGACACC<br>GATGTTGCCGTCCTCCTTGAAGT |
| <b>LINC01018-F</b><br><b>LINC01018-R</b> | CTGAGGCCAACACTGGGAAT<br>GGAAAGTCCGAGACCACGTT    |

**Supplementary Table 2:** Differentially expressed lncRNAs after 24 h of adipogenesis (Total Fraction).

| Ensembl ID      | lncRNA        | Log2FC     | FDR        |
|-----------------|---------------|------------|------------|
| ENSG00000224260 | RP1-272L16.1  | 8.95536389 | 5.68E-13   |
| ENSG00000230695 | AC012462.1    | 7.94710923 | 3.10E-07   |
| ENSG00000267480 | RP11-703I16.1 | 7.77883512 | 1.54E-05   |
| ENSG00000249609 | RP11-635L1.3  | 7.53946248 | 5.60E-05   |
| ENSG00000224251 | RP11-499O7.7  | 7.19036065 | 0.00012292 |
| ENSG00000226604 | PAPPA-AS2     | 6.96186343 | 0.00049721 |
| ENSG00000254860 | TMEM9B-AS1    | 5.75160772 | 2.17E-06   |
| ENSG00000196972 | LINC00087     | 5.42839945 | 0.00026015 |
| ENSG00000261578 | RP11-21L23.2  | 5.20346141 | 0.00013519 |
| ENSG00000234362 | AC104654.2    | 5.03622344 | 7.40E-11   |
| ENSG00000236882 | LINC01554     | 4.77679428 | 0.00034994 |
| ENSG00000270640 | RP11-373D23.2 | 4.52364266 | 0.00955651 |
| ENSG00000225937 | PCA3          | 4.1148481  | 0.00261037 |
| ENSG00000278309 | RP11-102K13.5 | 3.89240381 | 0.00224357 |
| ENSG00000266904 | LINC00663     | 3.65299324 | 0.00043746 |
| ENSG00000256006 | AC084117.3    | 3.49933219 | 0.00675332 |
| ENSG00000262601 | CTC-786C10.1  | 3.31874799 | 0.00045579 |
| ENSG00000249641 | HOXC13-AS     | 3.23103022 | 0.00021886 |
| ENSG00000254622 | NAV2-AS4      | 3.13807662 | 0.00321177 |
| ENSG00000267882 | RP4-569M23.5  | 2.93456244 | 0.00021278 |
| ENSG00000272356 | RP5-1112D6.8  | 2.88956525 | 0.00400075 |
| ENSG00000261324 | RP11-174G6.5  | 2.87932702 | 3.74E-08   |
| ENSG00000255043 | NAV2-AS5      | 2.87881796 | 1.04E-06   |
| ENSG00000260630 | SNAI3-AS1     | 2.80504131 | 0.00046042 |
| ENSG00000257151 | PWAR6         | 2.7697352  | 0.0002923  |
| ENSG00000182165 | TP53TG1       | 2.596586   | 0.00238894 |
| ENSG00000272841 | RP3-428L16.2  | 2.53248067 | 4.31E-12   |
| ENSG00000245812 | RP11-175K6.1  | 2.50009609 | 0.00962866 |
| ENSG00000246430 | LINC00968     | 2.28568133 | 1.15E-11   |
| ENSG00000263934 | SNORD3A       | 2.16100919 | 0.00495642 |
| ENSG00000244879 | GABPB1-AS1    | 2.0929611  | 3.39E-16   |
| ENSG00000223891 | OSER1-AS1     | 2.07381264 | 0.00326331 |
| ENSG00000226950 | DANCR         | 2.0415139  | 7.99E-09   |
| ENSG00000234608 | MAPKAPK5-AS1  | 1.9726833  | 1.66E-07   |
| ENSG00000203709 | C1orf132      | 1.96052779 | 0.00344312 |
| ENSG00000237036 | ZEB1-AS1      | 1.90067999 | 0.0011625  |
| ENSG00000270022 | RNU12         | 1.89928836 | 0.00029996 |
| ENSG00000258096 | RP11-474P2.2  | 1.87081358 | 0.00093803 |

|                 |                |            |            |
|-----------------|----------------|------------|------------|
| ENSG00000250548 | RP11-47I22.2   | 1.86276471 | 0.00937228 |
| ENSG00000221949 | LINC01465      | 1.85821905 | 0.00216832 |
| ENSG00000254343 | RP11-760H22.2  | 1.79817799 | 0.00711256 |
| ENSG00000280339 | RP11-736K20.4  | 1.74980542 | 0.00206087 |
| ENSG00000255471 | RP11-736K20.5  | 1.54273482 | 0.00492093 |
| ENSG00000262074 | SNORD3B-2      | 1.54204383 | 2.07E-07   |
| ENSG00000233117 | LINC00702      | -1.7359449 | 0.00556066 |
| ENSG00000172965 | MIR4435-1HG    | -1.7804279 | 1.24E-08   |
| ENSG00000269825 | CTD-3099C6.9   | -2.1398158 | 0.00075966 |
| ENSG00000203706 | SERTAD4-AS1    | -2.6051121 | 0.00070679 |
| ENSG00000231290 | APCDD1L-AS1    | -2.6501827 | 1.67E-07   |
| ENSG00000280206 | CTB-193M12.5   | -2.723787  | 0.00030036 |
| ENSG00000279338 | RP1-309I22.2   | -3.2302958 | 1.59E-22   |
| ENSG00000239332 | LINC01119      | -3.2642909 | 0.00099331 |
| ENSG00000248698 | LINC01085      | -3.4051041 | 9.85E-06   |
| ENSG00000226876 | RP11-36N20.1   | -3.6066941 | 0.00972605 |
| ENSG00000261760 | RP11-1223D19.1 | -3.6195576 | 1.89E-06   |
| ENSG00000230417 | LINC00856      | -3.7832421 | 0.00053757 |
| ENSG00000229563 | LINC01204      | -3.8778451 | 0.00218225 |
| ENSG00000246763 | RGMB-AS1       | -3.9306774 | 3.35E-09   |
| ENSG00000272327 | RP11-1002K11.1 | -4.3408644 | 1.30E-09   |
| ENSG00000250064 | RP11-123O22.1  | -5.9467682 | 3.81E-08   |

**Supplementary Table 3:** Differentially expressed lncRNAs after 24 h of adipogenesis (Polysomal Fraction).

| Ensembl ID      | lncRNA        | Log2FC       | FDR        |
|-----------------|---------------|--------------|------------|
| ENSG00000253716 | RP13-582O9.5  | 7.530705153  | 2.70E-07   |
| ENSG00000224260 | RP1-272L16.1  | 5.951644544  | 1.57E-13   |
| ENSG00000234362 | AC104654.2    | 4.646466402  | 1.25E-18   |
| ENSG00000267280 | TBX2-AS1      | 4.23752777   | 0.00093431 |
| ENSG00000261578 | RP11-21L23.2  | 4.108329289  | 0.00079322 |
| ENSG00000214900 | C14orf182     | 4.020996702  | 2.85E-09   |
| ENSG00000266921 | RP11-15A1.7   | 3.851683314  | 0.00164687 |
| ENSG00000266088 | RP5-1028K7.2  | 3.83623786   | 0.00031534 |
| ENSG00000267480 | RP11-703I16.1 | 3.725218469  | 0.00081168 |
| ENSG00000236882 | LINC01554     | 3.635685843  | 1.66E-06   |
| ENSG00000230838 | AC093850.2    | 3.538565494  | 0.00015827 |
| ENSG00000249641 | HOXC13-AS     | 3.098619881  | 4.48E-06   |
| ENSG00000259863 | SH3RF3-AS1    | 3.097397489  | 2.41E-06   |
| ENSG00000247095 | MIR210HG      | 2.971122156  | 0.00713805 |
| ENSG00000280339 | RP11-736K20.4 | 2.80192607   | 5.12E-05   |
| ENSG00000255471 | RP11-736K20.5 | 2.755211097  | 4.23E-06   |
| ENSG00000255284 | AP006621.5    | 2.687673129  | 0.00177963 |
| ENSG00000234779 | RP11-62F24.2  | 2.661073412  | 5.25E-05   |
| ENSG00000244586 | WNT5A-AS1     | 2.41993777   | 0.00051081 |
| ENSG00000267254 | ZNF790-AS1    | 2.306293369  | 0.00232235 |
| ENSG00000247271 | ZBED5-AS1     | 2.293251778  | 0.00018394 |
| ENSG00000272841 | RP3-428L16.2  | 2.28002333   | 1.09E-14   |
| ENSG00000244879 | GABPB1-AS1    | 2.279768789  | 1.01E-12   |
| ENSG00000261069 | SNORD116-20   | 2.260101871  | 0.0024511  |
| ENSG00000228035 | RP4-663N10.1  | 2.172479825  | 0.00196921 |
| ENSG00000182165 | TP53TG1       | 1.944210954  | 0.00022114 |
| ENSG00000223478 | RP11-545E17.3 | 1.921926846  | 0.00123218 |
| ENSG00000228630 | HOTAIR        | 1.914560232  | 0.00801433 |
| ENSG00000246430 | LINC00968     | 1.892859691  | 1.66E-09   |
| ENSG00000226950 | DANCR         | 1.746807871  | 2.66E-09   |
| ENSG00000267858 | MZF1-AS1      | 1.744419028  | 0.00058166 |
| ENSG00000237037 | NDUFA6-AS1    | 1.713869561  | 0.0074247  |
| ENSG00000223764 | RP11-54O7.3   | 1.667916745  | 3.93E-07   |
| ENSG00000245812 | RP11-175K6.1  | 1.577973203  | 0.00745688 |
| ENSG00000233016 | SNHG7         | 1.502630843  | 5.98E-09   |
| ENSG00000261105 | LMO7-AS1      | -1.542920484 | 0.00427174 |
| ENSG00000261801 | LOXL1-AS1     | -1.72056126  | 0.00011896 |
| ENSG00000261888 | AC144831.1    | -1.756336808 | 0.00227249 |

|                 |                |              |            |
|-----------------|----------------|--------------|------------|
| ENSG00000234840 | LINC01239      | -1.919795821 | 0.00550637 |
| ENSG00000245146 | LINC01024      | -1.939487163 | 0.00095796 |
| ENSG00000172965 | MIR4435-1HG    | -1.993752657 | 1.97E-16   |
| ENSG00000279338 | RP1-309I22.2   | -2.053941369 | 0.00113715 |
| ENSG00000231290 | APCDD1L-AS1    | -2.133839962 | 2.69E-11   |
| ENSG00000203706 | SERTAD4-AS1    | -2.172680021 | 4.42E-05   |
| ENSG00000270069 | MIR222HG       | -2.222493747 | 5.35E-08   |
| ENSG00000253658 | RP11-600K15.1  | -2.225066902 | 8.99E-05   |
| ENSG00000231607 | DLEU2          | -2.261792544 | 2.82E-05   |
| ENSG00000257167 | TMPO-AS1       | -2.263799585 | 0.00024767 |
| ENSG00000269825 | CTD-3099C6.9   | -2.266672232 | 6.10E-06   |
| ENSG00000239332 | LINC01119      | -2.278719327 | 8.30E-06   |
| ENSG00000226380 | MIR29B1        | -2.301209422 | 0.00281846 |
| ENSG00000233117 | LINC00702      | -2.302102305 | 1.45E-11   |
| ENSG00000267325 | LINC01415      | -2.308215852 | 4.19E-07   |
| ENSG00000272341 | RP1-151F17.2   | -2.563655137 | 0.0033292  |
| ENSG00000246763 | RGMB-AS1       | -2.794201724 | 0.00638142 |
| ENSG00000248698 | LINC01085      | -2.931921964 | 9.19E-14   |
| ENSG00000280206 | CTB-193M12.5   | -2.93393814  | 1.95E-05   |
| ENSG00000272327 | RP11-1002K11.1 | -2.962643524 | 7.01E-09   |
| ENSG00000236255 | AC009404.2     | -2.985463416 | 4.74E-07   |
| ENSG00000250056 | LINC01018      | -3.060046509 | 0.00070903 |
| ENSG00000233521 | RP5-1172A22.1  | -3.117578013 | 0.00119474 |
| ENSG00000267577 | CTD-2587H24.5  | -3.218376631 | 0.00077641 |
| ENSG00000241288 | RP11-379B18.5  | -3.255478242 | 0.00098444 |
| ENSG00000230417 | LINC00856      | -3.316000555 | 8.09E-08   |
| ENSG00000250303 | RP11-356J5.12  | -3.338218711 | 1.51E-05   |
| ENSG00000223811 | RP11-437J19.1  | -3.413961478 | 0.00011181 |
| ENSG00000229563 | LINC01204      | -3.452106553 | 1.58E-09   |
| ENSG00000261760 | RP11-1223D19.1 | -3.54444315  | 3.10E-13   |
| ENSG00000272975 | MYHAS          | -3.861259734 | 2.10E-06   |
| ENSG00000248869 | RP11-138I17.1  | -3.90458642  | 2.82E-07   |
| ENSG00000253161 | RP11-150O12.1  | -5.832715224 | 1.16E-09   |
| ENSG00000250038 | RP11-180C1.1   | -5.963250704 | 6.25E-18   |

**Supplementary Table 4:** Differentially expressed lncRNAs after 24 h of osteogenesis (Total Fraction).

| Ensembl ID      | lncRNA         | Log2FC     | FDR        |
|-----------------|----------------|------------|------------|
| ENSG00000224260 | RP1-272L16.1   | 8.27274105 | 1.16E-06   |
| ENSG00000261386 | CTD-2012K14.6  | 7.87016063 | 2.50E-05   |
| ENSG00000249456 | RP11-298J20.4  | 7.28298159 | 0.00039033 |
| ENSG00000267480 | RP11-703I16.1  | 7.08731748 | 0.00407812 |
| ENSG00000249609 | RP11-635L1.3   | 6.53922244 | 0.00582529 |
| ENSG00000268894 | PLCE1-AS1      | 6.42532621 | 5.80E-31   |
| ENSG00000230838 | AC093850.2     | 5.10323829 | 1.11E-05   |
| ENSG00000261578 | RP11-21L23.2   | 5.02110855 | 0.00934621 |
| ENSG00000236882 | LINC01554      | 4.8419407  | 0.00092097 |
| ENSG00000259828 | RP11-63E9.1    | 4.81422532 | 0.00519973 |
| ENSG00000266088 | RP5-1028K7.2   | 4.68538911 | 0.00339928 |
| ENSG00000254987 | RP11-563P16.1  | 3.90095    | 0.00019709 |
| ENSG00000235770 | LINC00607      | 3.72552109 | 1.16E-20   |
| ENSG00000237697 | LINC00312      | 3.65672434 | 6.89E-05   |
| ENSG00000278133 | RP11-196G11.5  | 3.22191282 | 0.00198115 |
| ENSG00000248890 | HHIP-AS1       | 3.15306905 | 0.00803823 |
| ENSG00000197301 | RP11-366L20.2  | 2.83167569 | 1.75E-06   |
| ENSG00000254343 | RP11-760H22.2  | 2.77444352 | 2.62E-06   |
| ENSG00000261324 | RP11-174G6.5   | 2.38709224 | 0.00205279 |
| ENSG00000255043 | NAV2-AS5       | 2.16566294 | 0.009629   |
| ENSG00000225135 | RP11-361F15.2  | 1.93628009 | 3.60E-05   |
| ENSG00000259330 | INAFM2         | 1.89222047 | 9.10E-06   |
| ENSG00000237187 | NR2F1-AS1      | 1.61458413 | 0.00081016 |
| ENSG00000246430 | LINC00968      | 1.54349814 | 0.00255898 |
| ENSG00000235531 | RP11-383H13.1  | -1.6689233 | 6.54E-06   |
| ENSG00000231290 | APCDD1L-AS1    | -1.8100121 | 0.00048887 |
| ENSG00000279095 | AC092066.1     | -1.9891353 | 7.76E-05   |
| ENSG00000224259 | LINC01133      | -2.0264139 | 4.93E-12   |
| ENSG00000249378 | LINC01060      | -2.1385667 | 0.00257648 |
| ENSG00000224743 | TEX26-AS1      | -2.8180509 | 0.00350366 |
| ENSG00000236255 | AC009404.2     | -3.0046471 | 0.00024527 |
| ENSG00000223749 | MIR503HG       | -3.0706649 | 1.04E-10   |
| ENSG00000272327 | RP11-1002K11.1 | -3.6161858 | 9.04E-09   |
| ENSG00000273002 | RP11-336K24.12 | -3.8381108 | 0.00158531 |
| ENSG00000226876 | RP11-36N20.1   | -4.1197155 | 0.00238335 |
| ENSG00000250064 | RP11-123O22.1  | -4.967432  | 6.17E-06   |
| ENSG00000250038 | RP11-180C1.1   | -5.4708315 | 0.0037106  |

**Supplementary Table 5:** Differentially expressed lncRNAs after 24 h of osteogenesis (Polysomal Fraction).

| Ensembl ID      | lncRNA         | Log2FC     | FDR        |
|-----------------|----------------|------------|------------|
| ENSG00000224260 | RP1-272L16.1   | 5.61446932 | 1.81E-07   |
| ENSG00000247311 | CTC-441N14.2   | 5.24496134 | 1.30E-07   |
| ENSG00000239828 | RP11-446H18.5  | 4.83652092 | 8.53E-05   |
| ENSG00000266088 | RP5-1028K7.2   | 4.73969229 | 1.63E-06   |
| ENSG00000268894 | PLCE1-AS1      | 4.70673837 | 2.61E-12   |
| ENSG00000225511 | LINC00475      | 4.61525614 | 0.00127184 |
| ENSG00000267080 | ASB16-AS1      | 4.36118524 | 0.00175614 |
| ENSG00000237697 | LINC00312      | 4.21396142 | 6.92E-05   |
| ENSG00000272053 | RP11-367G6.3   | 4.20142509 | 0.00478782 |
| ENSG00000276075 | CTD-2012K14.8  | 4.1767546  | 0.00212674 |
| ENSG00000267480 | RP11-703I16.1  | 4.15679601 | 0.00022178 |
| ENSG00000235770 | LINC00607      | 3.77380221 | 3.25E-19   |
| ENSG00000274627 | RP11-104N10.2  | 3.65309568 | 0.00805376 |
| ENSG00000254510 | RP11-867G23.10 | 3.63900132 | 0.00627922 |
| ENSG00000249641 | HOXC13-AS      | 3.46338392 | 1.82E-05   |
| ENSG00000254987 | RP11-563P16.1  | 3.38765673 | 3.45E-08   |
| ENSG00000236882 | LINC01554      | 3.38477428 | 3.00E-05   |
| ENSG00000279204 | RP11-175K6.2   | 3.34309396 | 0.00348106 |
| ENSG00000280339 | RP11-736K20.4  | 3.22222341 | 9.50E-05   |
| ENSG00000255471 | RP11-736K20.5  | 2.85508205 | 0.00041961 |
| ENSG00000259450 | RP11-265N7.1   | 2.66356503 | 1.22E-05   |
| ENSG00000197301 | RP11-366L20.2  | 2.62418661 | 8.11E-08   |
| ENSG00000236671 | PRKG1-AS1      | 2.62223657 | 0.00370475 |
| ENSG00000227145 | IL21-AS1       | 2.53099605 | 0.00055719 |
| ENSG00000268913 | AC026806.2     | 2.4952266  | 0.00725821 |
| ENSG00000245532 | NEAT1          | 2.41328672 | 8.35E-09   |
| ENSG00000259330 | INAFM2         | 2.40575516 | 2.73E-10   |
| ENSG00000260910 | LINC00565      | 2.37965217 | 0.00048223 |
| ENSG00000228035 | RP4-663N10.1   | 2.32457812 | 0.00637134 |
| ENSG00000269990 | CTD-3074O7.12  | 2.24447762 | 0.00354302 |
| ENSG00000245812 | RP11-175K6.1   | 2.19603231 | 0.00125471 |
| ENSG00000229729 | RP11-159G9.5   | 2.09690741 | 0.001754   |
| ENSG00000254343 | RP11-760H22.2  | 2.01373481 | 0.00342695 |
| ENSG00000248890 | HHIP-AS1       | 2.00875631 | 0.00476525 |
| ENSG00000182165 | TP53TG1        | 1.92120378 | 0.0074896  |
| ENSG00000279118 | RP11-517I3.2   | 1.86168046 | 0.00018131 |
| ENSG00000280143 | AP000892.6     | 1.81484249 | 9.70E-05   |

|                 |                |            |            |
|-----------------|----------------|------------|------------|
| ENSG00000240859 | AC093627.10    | 1.73396622 | 0.00035401 |
| ENSG00000250056 | LINC01018      | 1.7111585  | 0.00296366 |
| ENSG00000272565 | RP11-485G4.2   | 1.64333005 | 0.00056965 |
| ENSG00000242539 | AC007620.3     | 1.63676392 | 0.00015216 |
| ENSG00000272695 | GAS6-AS2       | 1.60099883 | 0.00799659 |
| ENSG00000246430 | LINC00968      | 1.55378212 | 0.00733645 |
| ENSG00000272933 | RP11-47A8.5    | 1.5530872  | 0.00581199 |
| ENSG00000226950 | DANCR          | 1.54120048 | 0.00138728 |
| ENSG00000248187 | RP11-184M15.1  | -1.5100959 | 0.00094564 |
| ENSG00000261040 | WFDC21P        | -1.5785988 | 0.00091492 |
| ENSG00000269893 | SNHG8          | -1.5794887 | 2.98E-05   |
| ENSG00000232774 | FLJ22447       | -1.6067996 | 0.00547754 |
| ENSG00000235531 | RP11-383H13.1  | -1.6282531 | 5.80E-05   |
| ENSG00000224032 | EPB41L4A-AS1   | -1.6840356 | 0.00020663 |
| ENSG00000177410 | ZFAS1          | -1.6942858 | 2.81E-06   |
| ENSG00000234741 | GAS5           | -1.7054639 | 0.00012727 |
| ENSG00000261824 | LINC00662      | -1.8985823 | 5.82E-05   |
| ENSG00000249378 | LINC01060      | -1.9636872 | 0.00455344 |
| ENSG00000224259 | LINC01133      | -2.3656047 | 4.10E-11   |
| ENSG00000272975 | MYHAS          | -2.4100178 | 0.00604814 |
| ENSG00000272327 | RP11-1002K11.1 | -2.6186856 | 0.00010566 |
| ENSG00000230623 | RP11-469A15.2  | -3.3121347 | 0.00088262 |
| ENSG00000236404 | VLDLR-AS1      | -3.547759  | 0.00064381 |
| ENSG00000235513 | RP4-756G23.5   | -3.8284574 | 0.00038099 |
| ENSG00000272341 | RP1-151F17.2   | -3.8913966 | 0.00182014 |
| ENSG00000223749 | MIR503HG       | -4.055987  | 0.00037501 |
| ENSG00000231196 | RP11-495P10.8  | -6.1044841 | 1.79E-06   |
| ENSG00000250038 | RP11-180C1.1   | -8.1864425 | 6.90E-18   |
